# Supplementary material
Source: Elsevier journal article supplement (https://www.sciencedirect.com/science/article/pii/S2173578621000184)
Supplement: mmc1 [file S2173578621000184:mmc1.doc]

**Anexos y tablas**

**Anexo 1**, Definiciones de términos relacionados1,2,3,4.

| **Término** | **Definición** |
| --- | --- |
| Trans | Corresponde al término más utilizado en la actualidad, e incluye a toda persona con discordancia entre sus genitales (sexo biológico) y su identidad de género, independiente de su deseo de modificar su aspecto mediante hormonas o cirugías. |
| Transgénero | Término que describía a aquellas personas con discordancia entre sexo biológico e identidad de género, que buscaban modificar sus genitales de acuerdo a su identidad de género. |
| Transexual | Aquella persona con discordancia entre su sexo biológico e identidad de género, que no buscaba modificar sus genitales. |
| Incongruencia de Genero | Definición para referirse a personas con discordancia entre su sexo biológico e identidad de género. Utilizada por la OMS en su última versión de la Clasificación Internacional de Enfermedades CIE-11 (2018), en el sub grupo de afecciones de la salud sexual (antes estaba entre las enfermedades mentales). |
| Disforia de Género | Es el término empleado en el manual de criterios diagnósticos del DSM V. El factor más relevante para su diagnóstico, además de la incongruencia entre sexo biológico e identidad de género, es la presencia de malestar o disforia clínicamente significativa asociado a esta condición. No todas las personas Trans tienen Disforia de género. |
| Persona Cis o Cis Género | Aquella persona en que el sexo biológico y la identidad de género coinciden o son acordes. |

**Anexo 2**, Descripción de las herramientas PROMs (patient related outcomes mesures) utilizadas para evaluar la función estética y sexual.

| **Nombre Herramienta** | **Descripción** | **Puntuación** |
| --- | --- | --- |
| **FSFI**  Cuestionario Índice de Función Sexual Femenina | 19 preguntas que analiza 6 principales componentes: deseo, excitación, lubricación, orgasmo, satisfacción y dolor. | Rango 2 – 36 puntos.  Un puntaje bajo 26,5 indica disfunción sexual.  Un score de 0 en un dominio indica no actividad sexual en el último mes. |
| **FGSIS**  Escala de Autoimagen Genital Femenina | 7 afirmaciones con puntaje del 1- 4 cada una, según paciente está entre “muy en desacuerdo(1)” a “muy de acuerdo(4)”. Objetivan los sentimientos de la mujer hacia sus propios genitales en un espectro amplio. (Tabla 4) | Rango de 7 a 28 puntos.  Mayor puntaje indica una Auto imagen genital más positiva. |
